# Supplementary material for: Suppression of LPS-induced tau hyperphosphorylation by serum amyloid A
Source: Springer Nature journal article supplement (doi:10.1186/s12974-016-0493-y), 2016-02-02

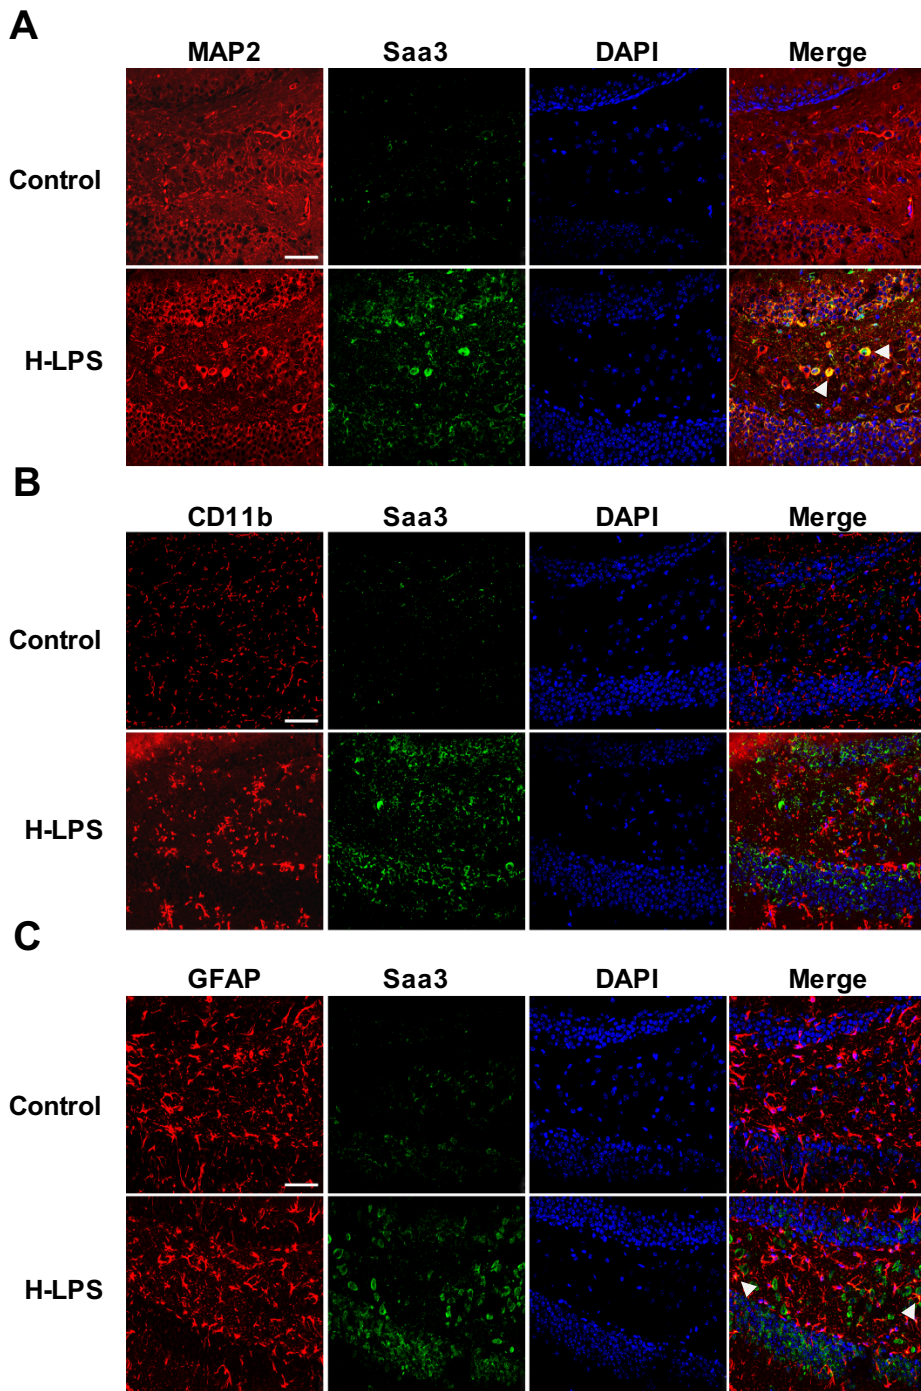

**A**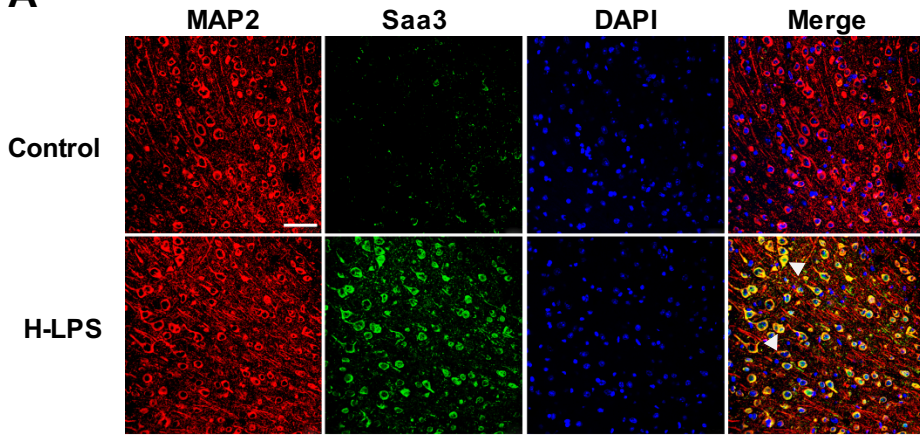**B**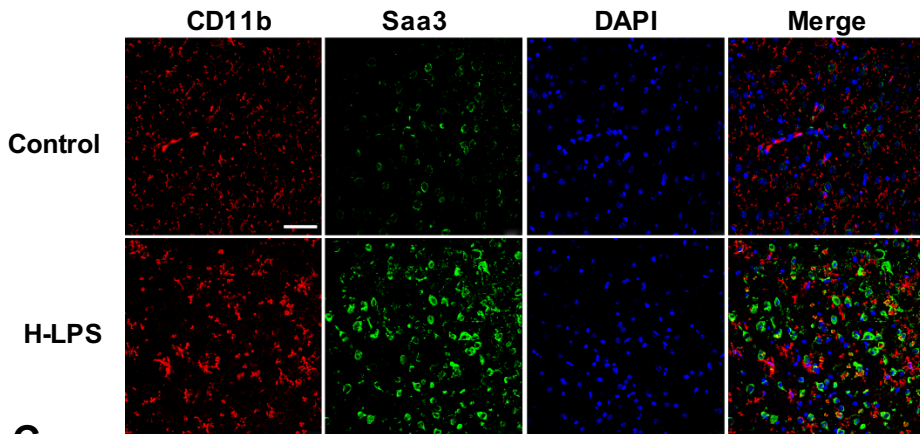**C**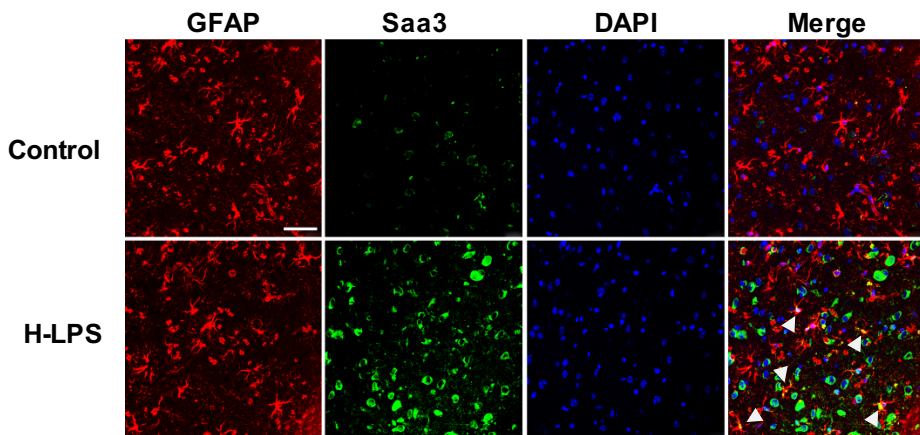

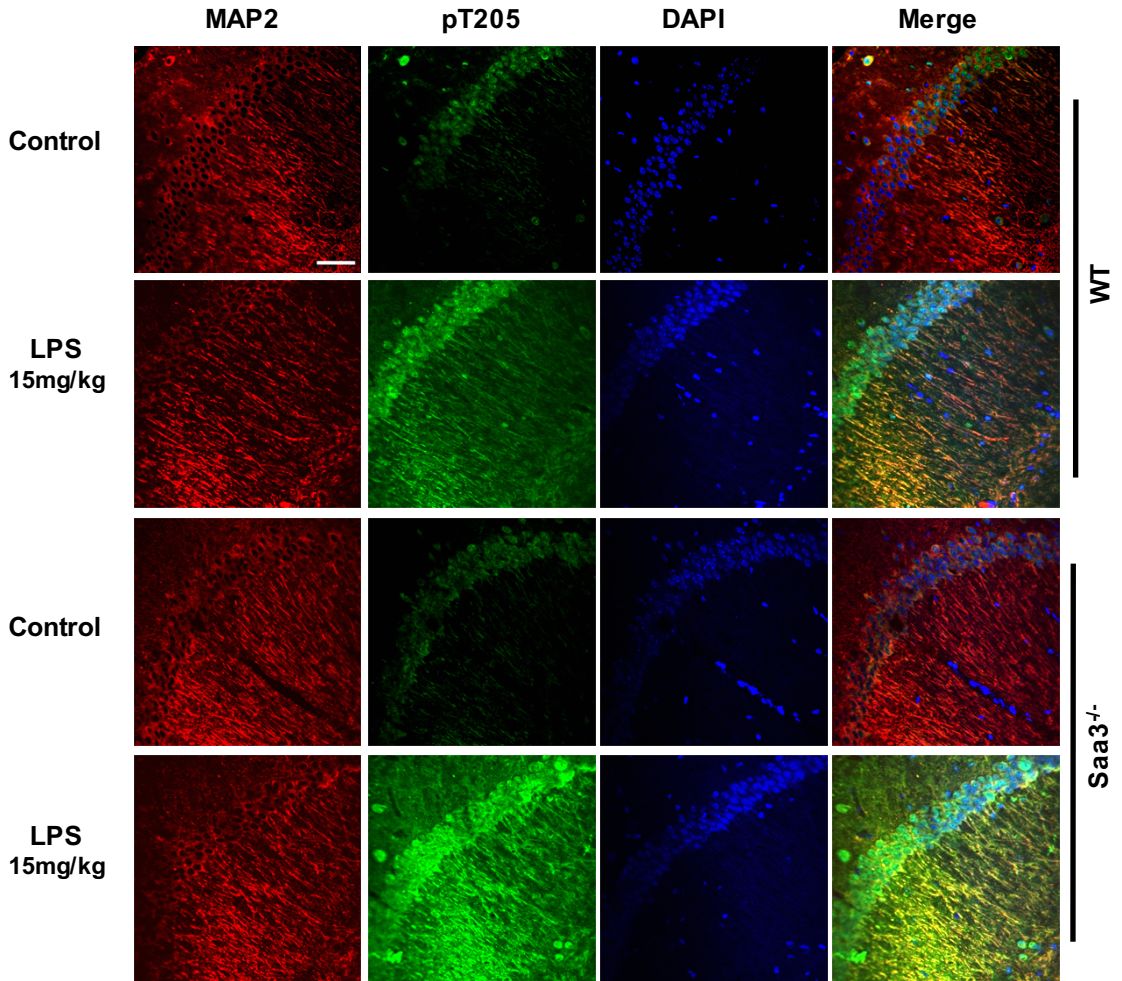

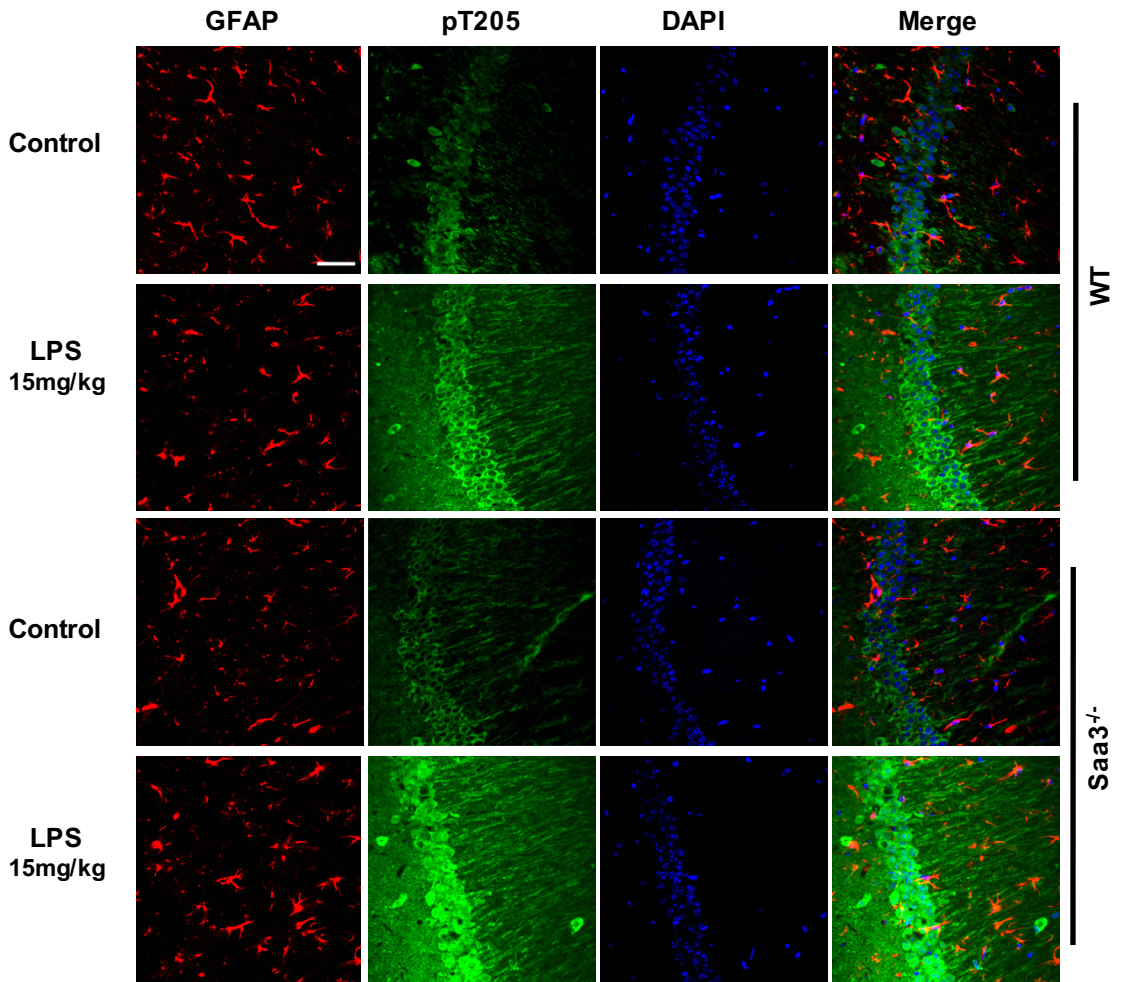

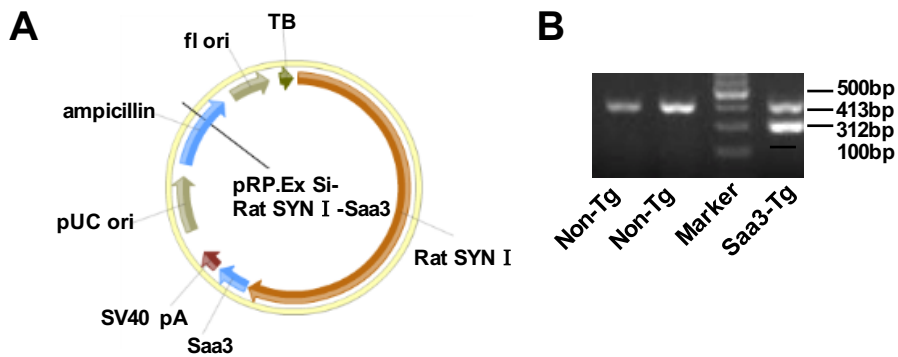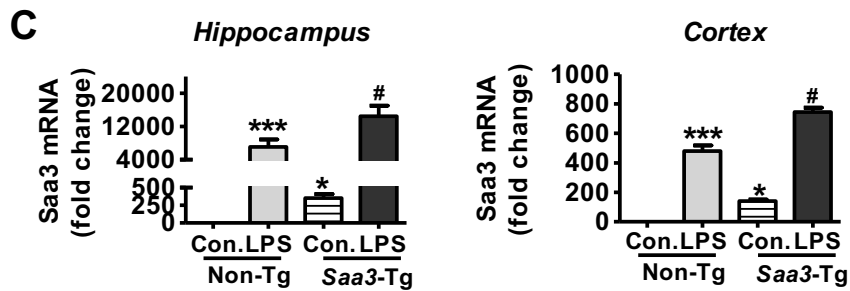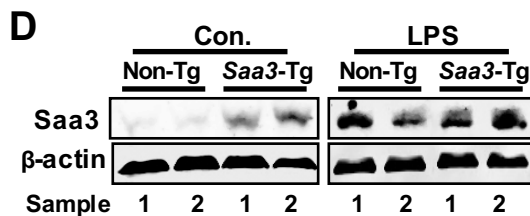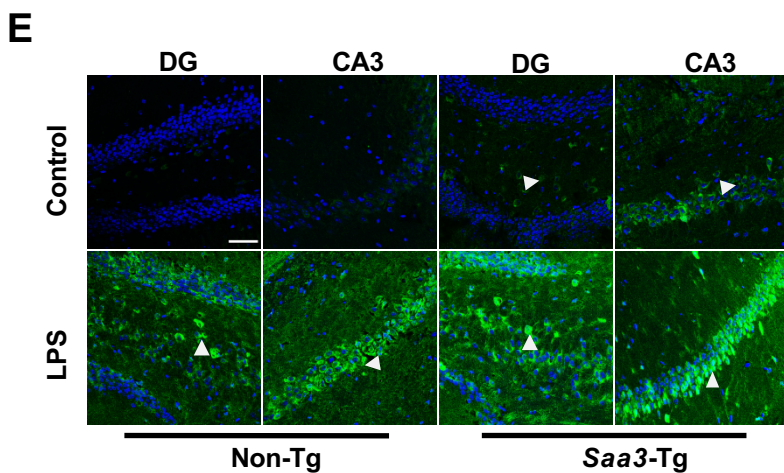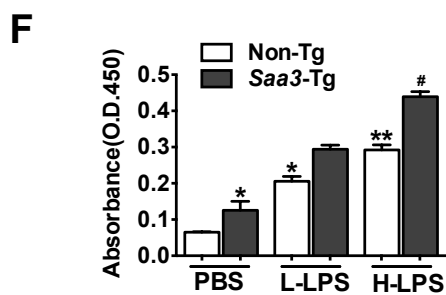

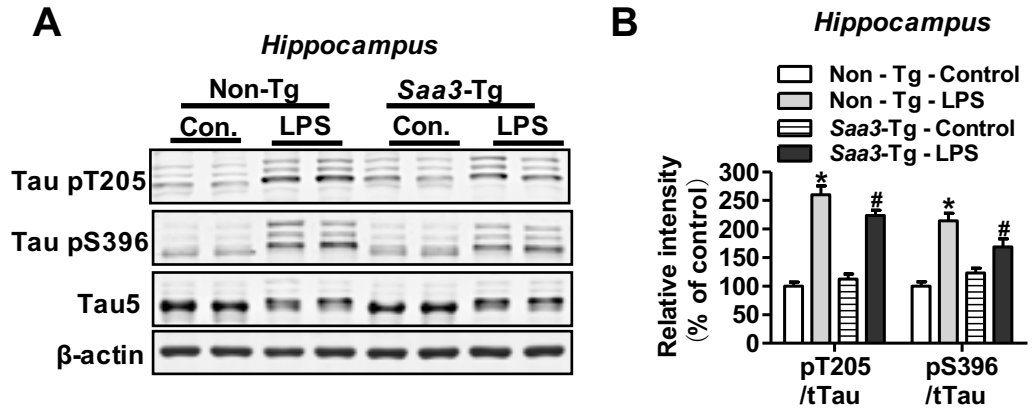

Supplement: MOESM3 [file 9769042]
